# 1 **K-FIT: An accelerated kinetic parameterization algorithm using steady-state** 2 **fluxomic data**

3 Saratram Gopalakrishnan<sup>1</sup>, Satyakam Dash<sup>1</sup>, and Costas Maranas<sup>1\*</sup>

4 <sup>1</sup> Department of Chemical Engineering, The Pennsylvania State University, University Park PA

5 \* Corresponding author

6 Phone: (814) 863-9958

7 Fax: (814) 865-7846

8 E-mail: [costas@psu.edu](mailto:costas@psu.edu)

## 9 **Abstract**

10 Kinetic models predict the metabolic flows by directly linking metabolite concentrations and  
11 enzyme levels to reaction fluxes. Robust parameterization of organism-level kinetic models that  
12 faithfully reproduce the effect of different genetic or environmental perturbations remains an  
13 open challenge due to the intractability of existing algorithms. This paper introduces K-FIT, an  
14 accelerated kinetic parameterization workflow that leverages a novel decomposition approach to  
15 identify steady-state fluxes in response to genetic perturbations followed by a gradient-based  
16 update of kinetic parameters until predictions simultaneously agree with the fluxomic data in all  
17 perturbed metabolic networks. The applicability of K-FIT to large-scale models is demonstrated  
18 by parameterizing an expanded kinetic model for *E. coli* (307 reactions and 258 metabolites)  
19 using fluxomic data from six mutants. The achieved thousand-fold speed-up afforded by K-FIT  
20 over meta-heuristic approaches is transformational enabling follow-up robustness of inference  
21 analyses and optimal design of experiments to inform metabolic engineering strategies.

22 Keywords: Kinetic models of metabolism; parameterization; *E. coli*; Metabolic engineering

## 23 **Introduction and Background**

24 The pressing need for the rapid development of truly predictive models of metabolism to  
25 accelerate build-design-test cycles for metabolic engineering has been widely reported (Cheng  
26 and Alper, 2014; Dromms and Styczynski, 2012; Long et al., 2015). Advances in synthetic  
27 biology (Chae et al., 2017; Cho et al., 2018; Stovicek et al., 2017) have alleviated the challenge  
28 of genome editing, placing the onus on the identification of suitable genetic modifications in  
29 metabolic engineering projects. Kinetic models of metabolism can alleviate the limitations of  
30 stoichiometric strain design techniques by quantitatively describing the relationship between  
31 fluxes, enzyme levels, and metabolite concentrations based on mechanistic and/or approximate  
32 rate law formalisms. The promise of superior product yield and production rate prediction  
33 offered by kinetic models comes at the expense of substantially increased experimental data  
34 requirements and complexity in model assembly, parameterization and interpretation of results.  
35 Long parameterization times stemming from poor scalability of existing parameterization  
36 frameworks ultimately preclude the deployment of follow up statistical analyses for large-scale  
37 kinetic models limiting insights into (i) the robustness of resolution of kinetic parameters given  
38 mutant flux datasets, (ii) kinetic parameter confidence levels, and (iii) the need for follow up  
39 measurements to improve prediction. These challenges motivate the development of K-FIT, a  
40 decomposition-based approach for parameterization of kinetic models using steady-state  
41 fluxomic and/or metabolomic data collected for multiple perturbation mutants. K-FIT builds  
42 upon the concept of Ensemble Modeling (EM) by anchoring concentrations and kinetic  
43 parameters to a reference strain. Unlike earlier efforts that employed a genetic algorithm  
44 (Khodayari et al., 2014) to parameterize kinetic models, K-FIT achieves three orders of  
45 magnitude improvement in efficiency by relying on a customized decomposition approach to

46 compute steady-state fluxes in mutant networks. K-FIT was first benchmarked against EM for  
47 three test kinetic models of increasing size ranging from 100 to 953 kinetic parameters to  
48 demonstrate the increase in computational savings with model size. K-FIT remained tractable  
49 even for a near genome-scale kinetic model containing 307 reactions, 258 metabolites, and 2,367  
50 kinetic parameters parameterized with 1,728 steady-state fluxes from six single gene-deletion  
51 mutants determined using <sup>13</sup>C-metabolic flux analysis (<sup>13</sup>C-MFA) (Long et al., 2018). The  
52 parameterization was carried out 100 times with random initializations and was completed within  
53 48 hours of cumulative computation time. The best solution was recovered 44 out of 100 times  
54 providing confidence that convergence to the true optimum was indeed achieved. The kinetic  
55 model k-ecoli307 accurately recapitulated fluxes to within 15 mmol/gdw-h of the fluxes reported  
56 by <sup>13</sup>C-MFA while also predicting fluctuations in glucose uptake in response to genetic  
57 perturbation and flux rerouting through energy metabolism to meet biosynthetic NADPH  
58 demands. The yield predictions of acetate, lactate, and malate for engineered strains were found  
59 to be within 30% of the experimental yield for metabolites derived from central metabolism. K-  
60 FIT offers, with no additional effort, local kinetic parameter sensitivity information through the  
61 computation of gradients allowing for optimality testing of all obtained solutions. This gradient  
62 output also enables the straightforward computation of parametric uncertainty, establishment of  
63 confidence intervals for kinetic parameters and derivation of metabolic control coefficients. This  
64 post-parameterization information can aid in the interpretation of kinetic model predictions,  
65 suggest efficient experiment design to improve prediction fidelity and ultimately inform  
66 metabolic engineering strategies.

## 67 **Results**

68 In this section, first a schematic representation of the workflow of K-FIT is described. The  
69 performance of K-FIT is benchmarked against the Ensemble Modeling (EM) (Khodayari et al.,  
70 2014) using three test kinetic models to assess the impact of model scale-up on the  
71 computational savings afforded by K-FIT. The applicability of K-FIT to near genome-scale  
72 models is then demonstrated by parameterizing an expanded kinetic model for *E. coli* (k-  
73 ecoli307) containing 307 reactions, 258 metabolites, and 2,367 kinetic parameters parameterized  
74 using <sup>13</sup>C-labeling data for ten proteinogenic amino acids from six single gene-deletion mutants  
75 (Long et al., 2018). Local regression based standard deviations for all estimated elementary  
76 kinetic and Michaelis-Menten parameters are computed by leveraging the gradient calculations  
77 embedded within K-FIT. The predictive capability of k-ecoli307 is then assessed by comparing  
78 predicted product yields against experimentally measured yields for six over-producing strains  
79 not used during model parameterization.

## 80 **The K-FIT Algorithm**

81 K-FIT is a gradient-based kinetic parameter estimation algorithm using steady-state flux  
82 measurements from multiple genetic perturbation mutants. The schematic workflow for K-FIT is  
83 shown in Figure 1 and Supplementary Figure S1. Reaction fluxes are related to metabolite  
84 concentrations using mass-action kinetics after decomposition of the enzyme catalytic  
85 mechanism into elementary steps (see supplementary methods for the detailed procedure for  
86 elementary step decomposition) as described by Tran *et al* (Tran et al., 2008). Conservation of  
87 mass across enzyme complexes and metabolites is therefore expressed as a system of bilinear  
88 equations. This formalism was chosen because it is mechanistically sound, obeys mass  
89 conservation laws and is inherently thermodynamically feasible (Saa and Nielsen, 2017). At the  
90 same time, it allows for easy integration of allosteric regulation without the need to derive

91 cumbersome case-specific nonlinear rate laws. The K-FIT algorithm iteratively applies the  
92 following three steps till the optimal set of kinetic parameters is found: (i) K-SOLVE, (ii)  
93 Steady-State Flux Evaluator (SSF-Evaluator) and (iii) K-UPDATE.

94 The objective of K-SOLVE is to anchor kinetic parameters to a reference state which is typically  
95 the wild-type (WT) network similar to the procedure described by Tran *et al.* (Tran et al., 2008).  
96 This is needed because for arbitrary assignment of values to the elementary kinetic parameters  
97 enzyme and metabolite conservation balances are not always satisfied. K-SOLVE uses as input  
98 the WT reverse fluxes of all elementary steps and the WT enzyme fractions. WT net fluxes are  
99 treated differently than mutant net fluxes. While net fluxes from the mutant networks form the  
100 sum of squares objective function to be minimized, net fluxes in the WT network are fixed in the  
101 model to their experimentally resolved values. This ensures that the inferred kinetic parameters  
102 remain consistent with both experimental WT flux measurements and inherently satisfy mass  
103 conservation laws for both enzymes and metabolites. Consequently, the specified (i) reverse WT  
104 elementary fluxes and (ii) WT enzyme fractions along with (iii) the specified net WT fluxes fix  
105 all degrees of freedom in the system of equations. Unique values for all kinetic parameters can  
106 thus be assigned so as they inherently satisfy mass balances across metabolites and enzymes in  
107 the WT network. This is an important consideration as mass balances are not always satisfied  
108 under metabolic steady-state for an arbitrary assignment of values to the kinetic parameters.

109 Kinetic parameters anchored by K-SOLVE are then used by SSF-Evaluator to compute the  
110 steady-state fluxes and concentrations across all mutants, one at a time. The system of bilinear  
111 algebraic equations in metabolite and enzyme fractions resulting from the elementary step  
112 decomposition of enzyme catalysis is partitioned into two sub-problems. The first bilinear sub-  
113 problem, representing conservation of mass across enzyme complexes, is reduced to a system of

114 linear algebraic equations in enzyme fractions in the mutant network when the metabolite  
115 concentrations in the mutant network are specified. Similarly, the second bilinear sub-problem  
116 describing conservation of mass across all metabolites reduces to a system of linear algebraic  
117 equations in metabolite concentrations in the mutant network when the enzyme fractions in the  
118 mutant network are specified. By iterating between these two linear sub-problems, the steady-  
119 state enzyme levels and metabolite concentrations in each mutant is identified. SSF-Evaluator  
120 begins with fixed-point iterations and switches to Newton steps closer to the solution. A semi-  
121 implicit Euler integration step is carried out whenever the Jacobian matrix in the Newton step  
122 becomes singular. Convergence is achieved when the concentrations of enzyme complexes and  
123 metabolites remain almost unchanged between successive iterations. This iterative scheme  
124 therefore enables the direct evaluation of steady-state fluxes (almost) without the need to  
125 integrate any ODEs and contributes to the speed-up of the kinetic parameterization process.

126 The calculated fluxes for all mutants are compared against the corresponding measured fluxes  
127 and the sum of squared residuals (SSR) representing the variance-weighted squared deviation of  
128 predicted fluxes from experimental data, as well as the first- and second-order gradients are  
129 computed by K-UPDATE. The WT reverse elementary fluxes and WT enzyme fractions are then  
130 updated using a Newton step and the core loop of K-FIT is repeated by returning to K-SOLVE  
131 until the minimum deviation of predicted fluxes from experimental measurements is reached.  
132 Note that the computation of first- and second-order gradients uses as input the local sensitivity  
133 of fluxes with respect to kinetic parameters. These local sensitivities can readily be computed by  
134 solving a system of linear equations (see supplementary methods) as opposed to having to  
135 perform costly forward sensitivity analysis. This enables K-FIT to confirm that any reported  
136 solution is indeed optimal while also allowing for the assembly of the covariance matrix from

137 which approximate confidence intervals for all estimated kinetic parameters can efficiently be  
138 derived.

### 139 **Benchmarking K-FIT against Ensemble Modeling**

140 The computational performance of the K-FIT algorithm was first compared against solution with  
141 a genetic algorithm (GA) operating on a population of models constructed using the Ensemble  
142 Modeling (EM) approach. Three test models of increasing sizes were used to assess the impact of  
143 model size on parameter estimation speed and solution reproducibility. The first small model  
144 containing 14 reactions, 11 metabolites, and 100 kinetic parameters was adapted from the three  
145 glycolytic pathways in *E. coli* and was parameterized using flux distributions from four single  
146 gene-deletion mutants (Supplementary Fig. S2a). The second medium-sized kinetic model  
147 containing 33 reactions, 28 metabolites, and 235 kinetic parameters was adapted from a previous  
148 study (Greene et al., 2017) and was parameterized using flux distributions from seven single  
149 gene-deletion mutants (Supplementary Fig. S2b). The third test model describing carbon flows  
150 through central and amino acid metabolism was adapted from the model developed by Foster *et*.  
151 *al.*, (2019 (Under Review)). This model (Supplementary Fig. S2c) contains 108 reactions, 65  
152 metabolites, and 953 kinetic parameters and was parameterized using flux distributions from  
153 seven single gene-deletion mutants. The test models along with the data required for kinetic  
154 parameterization is provided in supplementary tables ST1 – ST12.

155 Kinetic parameters were estimated in 9 minutes, 30 minutes, and 4 hours for the three models,  
156 respectively, using K-FIT. In contrast, GA required 60 hours, 726 hours, and 4,278 hours,  
157 respectively, to parameterize the same three models. Computational speed-up increased from  
158 100-fold for the small model to 1000-fold for the core kinetic model upon switching from GA to  
159 K-FIT. This dramatic reduction in parameterization time arises from the (largely) integration-free

160 steady-state flux evaluation using the SSF-Evaluator step and the fact that K-FIT traverses the  
161 variable space in a highly economical manner (i.e., Newton steps) requiring fewer than 500  
162 steady-state flux evaluations to identify the optimal solution. In contrast, the GA approach relies  
163 on iterative recombination of kinetic parameter vectors and required as many as 20,000 steady-  
164 state flux evaluations before finding the same solution (Khodayari et al., 2014) but without  
165 confirming optimality. SSF-Evaluator evaluated steady-state fluxes, on average in 0.42 seconds,  
166 1.13 seconds and 6.12 seconds, respectively, for the three models, whereas, numerical integration  
167 required 3.5 seconds, 120 seconds and 440 seconds, respectively. Bypassing integration also  
168 enables SSF-Evaluator to handle stiff systems of ODEs arising from the large dynamic range of  
169 kinetic parameters and ensuring that steady-state fluxes are always within a mass imbalance of  
170 just 0.001 mol%. It is important to note that Newton's method can only guarantee convergence  
171 to a local and not necessarily the global minimum of SSR. As a safeguard against failure to reach  
172 the true minimum, models were parametrized using K-FIT from 100 random initial starting  
173 points to determine the reproducibility of the obtained best solution. For the three test models K-  
174 FIT exhibited a best solution recovery of 98%, 93%, and 60%, respectively. This high solution  
175 reproducibility provides confidence that K-FIT is able to consistently converge to the lowest  
176 SSR of 0 for the small model, 8.9 for the medium-sized model, and 1.3 for the core model,  
177 respectively. Notably, no alternate optima in the vicinity of the best solution (within an SSR of  
178 100) was detected for any of the three models implying that the best SSR minimization solution  
179 is the only good kinetic parameterization candidate. The inherent ability of K-FIT to quickly  
180 calculate local sensitivities of predicted fluxes to metabolite concentrations was leveraged to  
181 confirm whether SSF-Evaluator reported steady-state concentrations that are stable. To this end,  
182 the eigenvalues of the Jacobian matrix (Greene et al., 2017) at metabolic steady-state were



183 calculated to confirm that the real part of all eigenvalues were strictly negative for all iterations  
184 and problems solved.

## 185 **Parameterization of a kinetic model (k-ecoli307) for *E. coli* with near-genome-wide** 186 **coverage**

187 Following the application to three test models of increasing models, K-FIT was then deployed  
188 for the parameterization of k-ecoli307, an *E. coli* kinetic model with near-genome-wide coverage  
189 similar to k-ecoli457 (Khodayari and Maranas, 2016). The expanded model containing 307  
190 reactions, 259 metabolites and 2,367 kinetic parameters, and encompasses central metabolism,  
191 expanded amino acid, fatty acid, and nucleotide pathways and lumped pathways for  
192 peptidoglycan biosynthesis. Compared to k-ecoli457 (Khodayari and Maranas, 2016), k-ecoli307  
193 lacks the pathways for anaerobic metabolism and secretion of organic acids as it was  
194 parameterized using data under aerobic growth only. Flux data for six single gene-deletion  
195 mutants were computed using <sup>13</sup>C-Metabolic Flux Analysis (<sup>13</sup>C-MFA) to recapitulate the  
196 measured labeling distribution of 10 proteinogenic amino acids grown with 1,2-<sup>13</sup>C-glucose as  
197 the carbon tracer (Long et al., 2018). This provided a total of 1,728 MFA-determined fluxes  
198 across six single gene-deletion mutants from upper glycolysis for kinetic parameterization. All  
199 69 substrate level regulatory interactions for 26 reactions in the expanded model were transferred  
200 from k-ecoli457. Complete cofactor balances were not included in k-ecoli307. Instead, k-  
201 ecoli307 only accounts for the net moles of ATP, NADH and NADPH produced or consumed in  
202 any reaction and disregards the recycling of ADP, AMP, NAD and NADP back to the  
203 phosphorylated/reduced form of the cofactor. This simplification is necessary to avoid metabolite  
204 pool dependencies in the stoichiometry matrix. These dependencies force the total concentration  
205 of (ATP + ADP + AMP), (NAD + NADH), and (NADP + NADPH) to be held constant across

206 all mutants (Vallabhajosyula et al., 2006) while allowing only the ratios of metabolite  
207 concentrations ATP/ADP, ADP/AMP, NAD/NADH and NADP/NADPH to vary across mutants  
208 (Greene et al., 2017).

209 The expanded model was parameterized using flux distributions from the six mutants  $\Delta pgi$ ,  
210  $\Delta gnd$ ,  $\Delta zwf$ ,  $\Delta eda$ ,  $\Delta edd$ , and  $\Delta fbp$  with 288 fitted fluxes per mutant. 100 fluxes were inferred  
211 using  $^{13}C$  labeling data whereas 207 reactions were growth-coupled. Parameterization using the  
212 K-FIT algorithm was completed in 48 hours on an Intel-i7 (4-core processor, 2.6GHz, 12GB  
213 RAM) computer with a minimum SSR of 131.05 and a solution reproducibility of 44%. The  
214 recapitulation of the experimentally measured fluxes by K-FIT for the six mutants is shown in  
215 Supplementary Figure S3. All predicted fluxes were within 15 mmol/gdw-h of their  
216 corresponding flux reported by  $^{13}C$ -MFA. This corresponds to a maximum deviation of only  
217 10% from the experimentally determined fluxes. Flux distributions for  $\Delta eda$ ,  $\Delta edd$ , and  $\Delta fbp$   
218 mutants were largely unchanged from WT (Supplementary Figures S3a, S3b, and S3c) alluding  
219 to the dispensability of the corresponding genes. In contrast, carbon flux was significantly  
220 rerouted in response to the knockout of *pgi*, *zwf*, and *gnd* genes. Glucose uptake remained similar  
221 to WT for the  $\Delta zwf$  mutant but routed completely via the EMP pathway (Supplementary Figure  
222 S3d). The non-oxidative pentose phosphate pathway (TKT and TAL reactions) operated in  
223 reverse to generate ribose-5-phosphate for nucleotide biosynthesis. Glucose catabolism solely via  
224 the EMP pathway increased acetate and biomass yields by 10%. The expanded model also  
225 revealed that the loss of NADPH production via the oxidative pentose phosphate pathway was  
226 compensated by a 90% increase in the flux through the transhydrogenase reaction in the  $\Delta zwf$   
227 strain (Supplementary table ST20). Glucose uptake for the  $\Delta gnd$  mutant was decreased by less  
228 than 10% compared to WT (Supplementary Figure S3e).  $\Delta gnd$  was the only strain with a

229 measurable flux through the ED pathway by rerouting 24.9 mmol/gdw-h of flux through EDD  
230 and EDA reactions is a ten-fold increased flux through the ED pathway relative to the WT  
231 network. Similar to  $\Delta zwf$ , the reversal of flux through the non-oxidative pentose phosphate  
232 pathway generated the required ribose-5-phosphate for nucleotide biosynthesis.

233 Of all the mutants,  $\Delta pgi$  involved the most significant flux rerouting relative to WT. Glucose  
234 uptake was reduced by 75% compared to WT resulting in a 70% reduction in growth rate  
235 (Supplementary Figure S3f). Flux redirection through the glyoxylate shunt and reduction of  
236 acetate secretion improved carbon routing towards biomass precursors, thereby increasing the  
237 biomass yield by 22% compared to WT. Interestingly, the ED pathway was found to carry only 2  
238 mmol/gdw-h of flux with almost all of the carbon being metabolized via the pentose phosphate  
239 pathway (Supplementary Figure S3f). In addition, an 80% reduction in flux through glycolysis  
240 along with the absence of acetate secretion lowers overall glycolytic ATP production. This loss  
241 is compensated by the reversal of flux through the transhydrogenase reaction relative to WT  
242 which allows the oxidation of excess NADPH generated by the oxidative pentose phosphate  
243 pathway (Supplementary Table ST20). *k-ecoli307* captured that non-competitive inhibition of  
244 the EDA reaction by glyceraldehyde-3-phosphate limits flux through the ED pathway in all  
245 strains but  $\Delta gnd$ . In the  $\Delta gnd$  mutant, a 37-fold increase in the concentration of 6-  
246 phosphogluconate provided the necessary driving force to overcome this product inhibition,  
247 thereby allowing a flux of 24.9 mmol/gdw-h through the ED pathway. In contrast, in mutant  
248  $\Delta pgi$  a two-fold increase in the concentration of glyceraldehyde-3-phosphate maintains the  
249 inhibition on the ED pathway which could not be overcome by a 40% increase in the  
250 concentration of 6-phosphogluconate (Hoque et al., 2011).

251 A total of 2,461  $K_m$  and  $V_{max}$  values were subsequently assembled using the estimated  
252 elementary kinetic parameters (Supplementary Table ST13). Contrary to conventional thought,  
253 the total number of Michaelis-Menten parameters (i.e.,  $K_m$  and  $V_{max}$ ) exceeded the number of  
254 elementary kinetic parameters (i.e.,  $k_p$ ). This is because the number of elementary kinetic  
255 parameters per reaction increases linearly with the number of participating species (reactants,  
256 products or regulators) (see section 1 in the Supplementary methods). However, the Michaelis-  
257 Menten formalism requires parameters for every combination of species in the rate expression  
258 yielding a quadratic increase in parameters (Cleland, 1963). For example, for an ordered bi-  
259 substrate reaction  $A + B \rightleftharpoons C + D$ , ten elementary kinetic parameters are needed as described in  
260 the Supplementary methods. Using the Michaelis-Menten formalism requires two  $V_{max}$  terms  
261 (one for the forward reaction and one for the reverse reaction) and ten  $K_m$  terms (four  $K_m$ s for  
262 individual metabolite concentrations  $[A]$ ,  $[B]$ ,  $[C]$  and  $[D]$  and six  $K_m$ s one for each pair  $[A][B]$ ,  
263  $[C][D]$ ,  $[A][C]$ ,  $[B][D]$  and triplet  $[A][B][C]$  and  $[B][C][D]$ ). Note that the Michaelis-Menten  
264 formalism requires two fewer parameters than using elementary kinetics for a reversible, uni-uni  
265 reaction (Cleland, 1963) and only one fewer parameter for a bi-uni or uni-bi reaction. However,  
266 for bi-bi and higher-order reaction mechanisms, the Michaelis-Menten formalism always  
267 requires more parameters than the elementary kinetics description (Cleland, 1963). These two  
268 competing effects yield the relatively close number of elementary and MM parameters for k-  
269 *ecoli307*. Nevertheless, the true number of Michaelis-Menten parameters would have been much  
270 larger than the ones required for the elementary kinetics description if complete cofactor  
271 metabolism, protons, water and phosphate groups were included in k-*ecoli307*. The larger  
272 number of Michaelis-Menten parameters may explain the reported highly correlated Michaelis-  
273 Menten parameters leading to multicollinearity (Heijnen and Verheijen, 2013).

274 At the optimal solution, the Hessian matrix computed by K-UPDATE represents the  
275 inverse of the covariance matrix computed in linear regression (Wiechert et al., 1997). The  
276 positive square root of the diagonal terms of this covariance matrix correspond to the standard  
277 deviation, in the kinetic parameters. The relative uncertainty in parameter estimation is defined  
278 as the ratio of standard deviation computed from the covariance matrix to the estimated  
279 parameter value. The standard deviation conceptually quantifies the sensitivity of the SSR  
280 objective function to local changes in the value of the inferred parameter. Large values for the  
281 standard deviation imply insensitivity of the SSR objective function to changes in the value of  
282 the inferred parameter. Note that this inference of standard deviation using linear regression is a  
283 local approximation and generally should be viewed as an overestimate of the true uncertainty as  
284 it captures neither covariances nor nonlinear effects for larger changes in parameter values.  
285 Using this method, the standard deviation representing the uncertainty in estimation for WT  
286 reverse elementary fluxes, enzyme fractions, and elementary kinetic parameters was computed.  
287 All 1,129 reverse elementary fluxes in the WT network were resolved with a relative uncertainty  
288 ( $\sigma_v/v_r$ ) of less than 1%. Furthermore, the average standard deviation for the inferred enzyme  
289 fractions ( $\sigma_e$ ) was only 0.04 mol/mol-total enzyme. A total of 793 out of 1,238 enzyme fractions  
290 had a standard deviation of less than 0.1 mol/mol-total enzyme and were resolved with high  
291 precision (Supplementary Figure S4a). However, 208 enzyme fractions (mostly with near zero  
292 values) were inferred with a standard deviation exceeding the corresponding parameter value  
293 leading to a relative uncertainty ( $\sigma_e/e$ ) exceeding 100% (Figure 2a) due to their small absolute  
294 value. These enzyme fractions include fractional abundances corresponding to 126 free enzymes  
295 and 19 inhibitor-bound enzyme complexes from the TCA cycle and aspartate metabolism, and 63  
296 metabolite-bound enzyme complexes in the ED pathway, TCA cycle and aspartate metabolism.

297 The large relative uncertainty in inference for these enzyme fractions alludes to insufficient  
298 fluxomic data for precise kinetic parameterization of these pathways. Uncertainty of inference  
299 propagates from the enzyme fractions to the elementary kinetic parameters, leading to 393 out of  
300 2,367 elementary kinetic parameters having a relative uncertainty ( $\sigma_{k_p}/k_p$ ) exceeding 100%  
301 (Figure 2b). Notably, 50 out of 69 kinetic parameters describing inhibition of enzyme catalysis  
302 were resolved with a relative uncertainty of less than 10%. Well resolved inhibition kinetic  
303 parameters include the inhibition of the oxidative pentose phosphate pathway by NADPH,  
304 product inhibition of the ED pathway by glyceraldehyde-3-phosphate, and product inhibition of  
305 cis-Aconitase by isocitrate. The narrow standard deviation also places a non-zero lower bound on  
306 the  $1\sigma$ -confidence interval for these inhibition constants implying the essentiality of regulatory  
307 interactions in k-ecoli307 to explain the available experimental flux datasets.

308       Upon computing the uncertainty in estimation of Michaelis-Menten parameters, 231 of  
309 the 570  $V_{max}$  parameters from branched-chain amino acid and fatty acid biosynthetic pathways  
310 were resolved with a relative uncertainty ( $\sigma_{V_{max}}/V_{max}$ ) of less than 10% (Figure 2c). In contrast,  
311 217  $V_{max}$  parameters from nucleotide biosynthesis, aspartate metabolism, serine metabolism,  
312 and the TCA cycle were resolved with a relative uncertainty exceeding 100%. Similarly, 893 of  
313 1,891  $K_m$  parameters from the EMP pathway, pentose phosphate pathway, TCA cycle and fatty  
314 acid biosynthesis were resolved with a relative uncertainty ( $\sigma_{K_m}/K_m$ ) of less than 10% (Figure  
315 2d), whereas 633  $K_m$  parameters from nucleotide biosynthesis, amino acid metabolism and the  
316 glyoxylate shunt were resolved with a relative uncertainty exceeding 100%. As expected, the  
317 estimation uncertainty for the elementary kinetic parameters propagated to  $K_m$  and  $V_{max}$ .  
318 However, the fraction of unresolved Michaelis-Menten parameters was substantially higher  
319 (33.4% of all  $K_m$  and 38.1% of all  $V_{max}$ ) than the fraction of poorly resolved elementary kinetic

320 parameters (16.6%). The higher fraction of unresolved Michaelis-Menten parameters stems from  
321 the fact that Michaelis-Menten parameters are assembled as a nonlinear combination of  
322 elementary kinetic parameters due to which the high relative uncertainty for any one elementary  
323 kinetic parameter can propagate to multiple Michaelis-Menten parameters. It is important to note  
324 that the approach used for computing standard deviations is based on statistical analysis of linear  
325 regression which only holds true in the neighborhood of the optimal solution. The analysis can  
326 be confounded by the nonlinear behavior of the kinetic model upon moving further away from  
327 the optimal solution. In addition, by looking at a single parameter at a time information of  
328 covariances between parameters is lost and the inferred uncertainty significantly overestimates  
329 the true parametric uncertainty. A more rigorous profile-likelihood method (Antoniewicz et al.,  
330 2006) can be employed to account for the nonlinear structure of the kinetic model that generally  
331 results in narrower confidence intervals as commonly seen in 13C-MFA.

332 The predictive capability of the model was evaluated by comparing the model prediction of  
333 product yields in engineered strains with the corresponding experimental yield. The genetic  
334 perturbation mutants considered for evaluation of predictive capability were not included in the  
335 training dataset for kinetic parameterization. Of the six over-producing strains evaluated, the  
336 kinetic model successfully predicted the yields of acetate, malate, and lactate to within 30% of  
337 the reported experimental yield (Table 1). This indicates that the genetic perturbations in the  
338 training dataset for parameterization and that the regulatory structure of the expanded kinetic  
339 model is sufficient to explain the phenotypic response of *E. coli* to perturbations in the EMP  
340 pathway. The yield predictions for acetate and malate were superior to those by k-ecoli457 due  
341 to the fact that both the training dataset for parameterization of the expanded model and  
342 cultivation of the engineered strains were at the same mid-exponential growth phase, whereas,

343 the training dataset for k-ecoli457 was generated during late exponential growth phase. The  
344 transcriptomic and fluxomic differences between these two growth conditions limits the carbon  
345 flux through acetate metabolism in the late exponential growth phase (Ishii et al., 2007). Unlike  
346 predictions for core metabolism, product yields originating from peripheral metabolism were  
347 poorly predicted by both models. This is because, growth-coupling of peripheral metabolic  
348 pathways limits the flux through these pathways to less than 5 mmol/gdw-h in all mutants. The  
349 limited redirection of fluxes within peripheral metabolism when compared to central metabolism  
350 leads to insufficient fluxomic data for kinetic parameterization of peripheral metabolic pathways  
351 and therefore, adversely impacts the prediction fidelity of both kinetic models.

352

## 353 **Discussion**

354 This manuscript details the development of K-FIT, an accelerated kinetic parameterization  
355 algorithm based on steady-state fluxomic data. The K-FIT algorithm estimates kinetic parameters  
356 by solving a nonlinear least-squares minimization problem to recapitulate experimentally  
357 measured steady-state metabolite concentrations and fluxes using an iterative loop comprised of  
358 three steps: K-SOLVE, SSF-Evaluator, and K-UPDATE. The computational savings afforded by  
359 bypassing ODE integration improves parameterization speed of K-FIT by over three orders of  
360 magnitude compared to the GA-based EM procedure for a core model of metabolism containing  
361 953 kinetic parameters. These savings are likely to become even more pronounced for larger  
362 models. These computational savings enable the evaluation of reproducibility of kinetic  
363 parameterization within reasonable time even for large-scale models, which was previously not  
364 possible using meta-heuristic methods. The parallelizable architecture of SSF-Evaluator



365 improves the scalability of the procedure while allowing compatibility with GPU-based  
366 computing architectures which affords significant improvements in computation speed. The  
367 iterative scheme presented in SSF-Evaluator is inherently numerically stable which allows it to  
368 handle stiff systems of equations with ease while permitting reliable calculation of first- and  
369 second-order gradients. Furthermore, the ability to calculate gradients enables local statistical  
370 analysis of the inferred kinetic parameters.

371 The applicability of K-FIT to large-scale models was demonstrated using an expanded kinetic  
372 model of *E. coli* containing 307 reactions, 258 metabolites, and 2,367 kinetic parameters,  
373 parameterized using fluxes elucidated using 13C-MFA. In order to avoid any error propagation  
374 arising from flux projection from simpler models, a recently developed two-step computational  
375 pipeline (Foster et al., 2019 (Under Review)) was used for kinetic parameterization using 13C-  
376 labeling data. First, fluxes were elucidated for the expanded model in the WT and six single  
377 gene-deletion strains using 13C-MFA. The elucidated fluxes were then used to parameterize the  
378 kinetic model corresponding to the same stoichiometric model. Although the expanded kinetic  
379 model recapitulated the fluxes better than a core model for *E. coli*, product yield predictions in  
380 engineered strains did not differ significantly compared to those predicted by the core model.  
381 Compared to k-ecoli457, yield predictions for acetate and malate were better recapitulated by k-  
382 ecoli307 because k-ecoli307 was parameterized using fluxomic data generated in the mid-  
383 exponential growth phase. This similarity in growth conditions between the training dataset and  
384 the engineered strains limits any proteome re-allocations that could lower the predictive  
385 capabilities of parameterized kinetic models. Yield predictions for metabolites from peripheral  
386 metabolism by both k-ecoli307 and k-ecoli457 differed from experimental yields by almost  
387 100% (Table 1). This was traced back to insufficient fluxomic data from peripheral metabolism

388 across the considered mutants due to growth coupling. Since most amino acids are not  
389 catabolized by *E. coli*, reliable parameterization of these pathways requires model expansion to  
390 amino acid pool turnover by protein synthesis and degradation. Additional fluxomic and  
391 metabolomic data from overproducing strains and auxotrophs will also help capture the link  
392 between genetic perturbations and increased flux through peripheral metabolism as the WT strain  
393 of *E. coli* does not secrete any amino acids during the mid-exponential growth phase.

394 A novel feature introduced by K-FIT is the rapid computation of local sensitivity of predicted  
395 fluxes and metabolite concentrations to kinetic parameters, which enables easy computation of  
396 the gradient and Hessian of the least-squares objective function for efficient traversal of the  
397 feasible kinetic parameter space. Since the Hessian represents the inverse of the covariance  
398 matrix in the neighborhood of the optimal solution, K-FIT is able to compute uncertainty in  
399 parameterization estimation with no added cost. Interestingly, reverse elementary fluxes in the  
400 WT strain were precisely estimated with a mean relative uncertainty of less than 1%. WT  
401 enzyme fractions were also resolved with a mean standard deviation of 0.04 mol/mol-total  
402 enzyme. However, the low abundance of 208 enzyme complexes relative to their corresponding  
403 standard deviation leads to a relative uncertainty exceeding 100%. This large relative uncertainty  
404 propagates to elementary kinetic parameters and Michaelis-Menten parameters due to nonlinear  
405 mapping of WT enzyme fractions to kinetic parameters. It is important to note that uncertainty  
406 analysis based on linear regression is accurate only near the optimal solution and a rigorous  
407 analysis accounting for the nonlinear behavior of the kinetic model will be required to compute  
408 the accurate confidence intervals further away from the optimal solution. Accurate confidence  
409 intervals will provide insights into resolvability of kinetic parameters for the set of experimental  
410 data and enable the identification of informative mutants (Zomorodi et al., 2013) and design of

411 experiments (Banga and Balsa-Canto, 2008) to pin down the poorly resolved kinetic parameters.  
412 Furthermore, using accurate confidence intervals, additional insights into reaction reversibility  
413 and importance of regulatory interactions can be gleaned. Currently, the statistical significance of  
414 regulatory interactions can only be evaluated using frameworks such as SIMMER (Hackett et al.,  
415 2016)

416 Overall, K-FIT highlights the data-demanding nature of the kinetic parameterization problem.  
417 Although kinetic parameterization was performed using only steady-state flux data, steady-state  
418 metabolite concentration data can also be included in the SSR objective function. In all studies  
419 enzyme levels were assumed to remain the same in mutants as in WT with the exception of  
420 enzymes that are associated with knock-out genes which were set to zero. Nevertheless, enzyme  
421 levels in mutant strains can be pre-specified in K-FIT if the information is known *a priori*.  
422 Ideally, one would want to integrate allosteric with transcriptional regulation so that the enzyme  
423 concentrations in the mutant networks can be related to the altered metabolite concentrations  
424 (Fuhrer et al., 2017). This would ultimately enable the integration of mutant network data  
425 generated under both genetic and environmental perturbations and improve its predictive  
426 capabilities. Furthermore, the local sensitivity of fluxes and metabolite concentrations with  
427 respect to kinetic parameters directly map to elasticity coefficients used in metabolic control  
428 analysis. They can thus be used to calculate flux and concentration control coefficients at  
429 minimal additional cost to inform metabolic engineering strategies.

## 430 **Methods**

### 431 **Kinetic parameterization using K-FIT**

432 K-FIT is a gradient-based kinetic parameterization algorithm that minimizes the least-squares  
433 objective function representing the weighted squared deviation between predicted and measured  
434 steady-state metabolic fluxes (and possibly metabolite concentrations) across multiple genetic  
435 perturbation mutants. The full mathematical description for the K-FIT algorithm is provided in  
436 the supplementary methods. The least-squares NLP is solved using the Levenberg-Marquardt  
437 algorithm (Madsen et al., 2004) in conjunction with the active-set method for enforcing linear  
438 inequality constraints (Gill et al., 1984). K-FIT is encoded and implemented in MATLAB<sup>TM</sup> and  
439 run on an Intel-i7 (4-core processor, 2.6GHz, 12GB RAM) computer. K-FIT is tested using  
440 kinetic models at different size scales. The full source-code is made available on GitHub.

441 Computation of standard deviations for estimated kinetic parameters was performed using linear  
442 regression tools applied to a local linearization of mutant fluxes using Taylor series expansion  
443 (Wiechert et al., 1997). Briefly, the Covariance matrix  $\mathbf{C}$  is computed by inverting the Hessian  $\mathbf{H}$   
444 computed by K-UPDATE. When the linear approximation holds, the diagonal of the covariance  
445 matrix represents the estimation variance of kinetic parameters. The approximate standard  
446 deviation of kinetic parameter  $k_p$  ( $\sigma_p$ ) is evaluated as  $\sigma_{k_p} = \sqrt{C_{pp}}$ . The approximate  $1\sigma$   
447 confidence interval is computed as  $k_p \pm \sigma_{k_p}$ . Note that this method of analysis does not capture  
448 covariance between parameters which is expected to significantly lower uncertainty.

#### 449 **Construction of the expanded kinetic model of *E. coli*, k-ecoli307**

450 The expanded metabolic model is constructed by de-lumping the central and peripheral  
451 metabolic pathways in the core model (Foster et al., 2019 (Under Review)) based on the reported  
452 biomass composition (Neidhardt and Curtiss, 1996). The expanded model contains 307 reactions  
453 and 258 metabolites. Atom mapping for the additional reactions were obtained from the

454 previously published genome-scale carbon mapping model for *E. coli* (Gopalakrishnan and  
455 Maranas, 2015). The amino acid labeling data for flux elucidation was obtained from the  
456 published work by Long *et al* (2018). Metabolic fluxes and 95% confidence intervals were  
457 elucidated using <sup>13</sup>C-metabolic flux analysis as described earlier (Antoniewicz *et al.*, 2006;  
458 Gopalakrishnan and Maranas, 2015). The mechanism and allosteric regulation of enzyme-  
459 catalyzed reactions in the model were obtained from k-ecoli457, the near-genome-scale kinetic  
460 model for *E. coli* (Khodayari and Maranas, 2016). The standard deviation  $\sigma_j$  corresponding to  
461 the estimated flux  $V_j$  to be used as a weighting factor in the K-FIT algorithm is computed from  
462 the lower and upper bounds of the confidence interval  $V_j^{LB}$  and  $V_j^{UB}$  reported by <sup>13</sup>C-MFA as  
463  $\sigma_j = \frac{V_j^{UB} - V_j^{LB}}{3.92}$ . The input files containing the model, reaction mechanism descriptions, and  
464 experimental data used for kinetic parameterization are provided in Supplementary Tables ST13  
465 – ST16. Computed kinetic parameters were also packaged into Michaelis-Menten parameters as  
466 described earlier (Khodayari and Maranas, 2016). The estimated kinetic parameters and  
467 Michaelis-Menten parameters are reported in Supplementary Tables ST21 and ST22.

## 468 **ACKNOWLEDGEMENT**

469 This work was supported by the National Science Foundation at the Pennsylvania State  
470 University, University Park, under grant NSF/MCB-1615646, by the US Department of Energy  
471 (DOE) under grants DE-SC0018260, and by the Center for Bioenergy Innovation under the US  
472 Department of Energy (DOE) under grant DE-AC05-000R22725.

473

474

## 475 **References**

476 Antoniewicz, M.R., Kelleher, J.K., and Stephanopoulos, G. (2006). Determination of confidence  
477 intervals of metabolic fluxes estimated from stable isotope measurements. *Metab Eng* 8, 324-  
478 337.

479 Banga, J.R., and Balsa-Canto, E. (2008). Parameter estimation and optimal experimental design.  
480 *Essays Biochem* 45, 195-209.

481 Chae, T.U., Choi, S.Y., Kim, J.W., Ko, Y.S., and Lee, S.Y. (2017). Recent advances in systems  
482 metabolic engineering tools and strategies. *Curr Opin Biotechnol* 47, 67-82.

483 Cheng, J.K., and Alper, H.S. (2014). The genome editing toolbox: a spectrum of approaches for  
484 targeted modification. *Curr Opin Biotechnol* 30, 87-94.

485 Cho, S., Shin, J., and Cho, B.K. (2018). Applications of CRISPR/Cas System to Bacterial  
486 Metabolic Engineering. *Int J Mol Sci* 19.

487 Cleland, W.W. (1963). The kinetics of enzyme-catalyzed reactions with two or more substrates  
488 or products: I. Nomenclature and rate equations. *Biochimica et Biophysica Acta (BBA) -*  
489 *Specialized Section on Enzymological Subjects* 67, 104-137.

490 Dromms, R.A., and Styczynski, M.P. (2012). Systematic applications of metabolomics in  
491 metabolic engineering. *Metabolites* 2, 1090-1122.

492 Foster, C.J., Gopalakrishnan, S., Antoniewicz, M.R., and Maranas, C.D. (2019 (Under Review)).  
493 From E. coli mutant <sup>13</sup>C labeling data to a core kinetic model: A kinetic model parameterization  
494 pipeline.

495 Fuhrer, T., Zampieri, M., Sevin, D.C., Sauer, U., and Zamboni, N. (2017). Genomewide  
496 landscape of gene-metabolome associations in Escherichia coli. *Mol Syst Biol* 13, 907.

497 Gill, P.E., Murray, W., and Wright, M.H. (1984). *Practical Optimization*. (London: Academic  
498 Press).

499 Gopalakrishnan, S., and Maranas, C.D. (2015). <sup>13</sup>C metabolic flux analysis at a genome-scale.  
500 *Metabolic engineering* 32, 12-22.

501 Greene, J.L., Waechter, A., Tyo, K.E.J., and Broadbelt, L.J. (2017). Acceleration Strategies to  
502 Enhance Metabolic Ensemble Modeling Performance. *Biophys J* 113, 1150-1162.

503 Hackett, S.R., Zanutelli, V.R., Xu, W., Goya, J., Park, J.O., Perlman, D.H., Gibney, P.A.,  
504 Botstein, D., Storey, J.D., and Rabinowitz, J.D. (2016). Systems-level analysis of mechanisms  
505 regulating yeast metabolic flux. *Science* 354.

506 Heijnen, J.J., and Verheijen, P.J. (2013). Parameter identification of in vivo kinetic models:  
507 limitations and challenges. *Biotechnol J* 8, 768-775.

508 Hoque, M.A., Fard, A.T., Rahman, M., Alattas, O., Akazawa, K., and Merican, A.F. (2011).  
509 Comparison of dynamic responses of cellular metabolites in *Escherichia coli* to pulse addition of  
510 substrates. *Biologia* 66, 954.

511 Ishii, N., Nakahigashi, K., Baba, T., Robert, M., Soga, T., Kanai, A., Hirasawa, T., Naba, M.,  
512 Hirai, K., Hoque, A., et al. (2007). Multiple high-throughput analyses monitor the response of *E.*  
513 *coli* to perturbations. *Science* 316, 593-597.

514 Khodayari, A., and Maranas, C.D. (2016). A genome-scale *Escherichia coli* kinetic metabolic  
515 model k-ecoli457 satisfying flux data for multiple mutant strains. *Nat Commun* 7, 13806.

516 Khodayari, A., Zomorodi, A.R., Liao, J.C., and Maranas, C.D. (2014). A kinetic model of  
517 *Escherichia coli* core metabolism satisfying multiple sets of mutant flux data. *Metab Eng* 25, 50-  
518 62.

519 Long, C.P., Gonzalez, J.E., Feist, A.M., Palsson, B.O., and Antoniewicz, M.R. (2018).  
520 Dissecting the genetic and metabolic mechanisms of adaptation to the knockout of a major  
521 metabolic enzyme in *Escherichia coli*. *Proc Natl Acad Sci U S A* 115, 222-227.

- 522 Long, M.R., Ong, W.K., and Reed, J.L. (2015). Computational methods in metabolic engineering  
523 for strain design. *Curr Opin Biotechnol* 34, 135-141.
- 524 Madsen, K., Nielsen, H.B., and Tingleff, O. (2004). *Methods for Non-Linear Least Squares*  
525 *Problems* (2nd Edition). (Kongens Lyngby: Technical University of Denmark).
- 526 Neidhardt, F.C., and Curtiss, R. (1996). *Escherichia coli and Salmonella : cellular and molecular*  
527 *biology*.
- 528 Saa, P.A., and Nielsen, L.K. (2017). Formulation, construction and analysis of kinetic models of  
529 metabolism: A review of modelling frameworks. *Biotechnol Adv* 35, 981-1003.
- 530 Stovicek, V., Holkenbrink, C., and Borodina, I. (2017). CRISPR/Cas system for yeast genome  
531 engineering: advances and applications. *FEMS Yeast Res* 17.
- 532 Tran, L.M., Rizk, M.L., and Liao, J.C. (2008). Ensemble modeling of metabolic networks.  
533 *Biophys J* 95, 5606-5617.
- 534 Vallabhajosyula, R.R., Chickarmane, V., and Sauro, H.M. (2006). Conservation analysis of large  
535 biochemical networks. *Bioinformatics* 22, 346-353.
- 536 Wiechert, W., Siefke, C., de Graaf, A.A., and Marx, A. (1997). Bidirectional reaction steps in  
537 metabolic networks: II. Flux estimation and statistical analysis. *Biotechnol Bioeng* 55, 118-135.
- 538 Zomorodi, A.R., Lafontaine Rivera, J.G., Liao, J.C., and Maranas, C.D. (2013). Optimization-  
539 driven identification of genetic perturbations accelerates the convergence of model parameters in  
540 ensemble modeling of metabolic networks. *Biotechnol J* 8, 1090-1104.

541



Figure 1: Overview of the core loop of the K-FIT algorithm

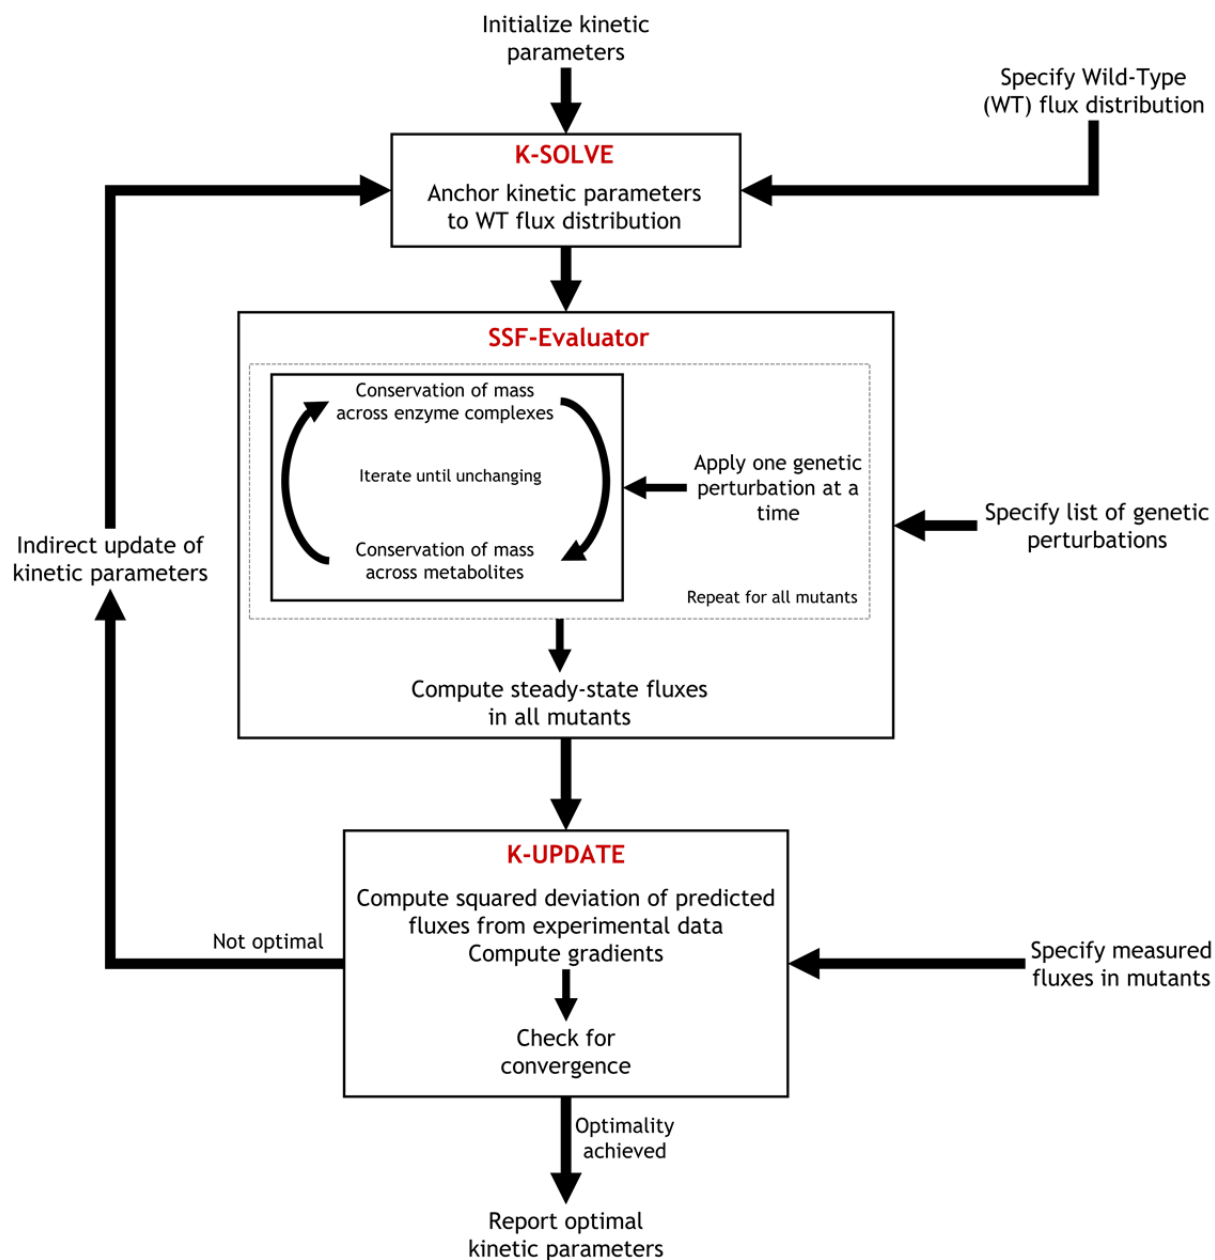

Figure 2: Distribution of relative uncertainty in estimation for (a) WT enzyme fractions, (b) elementary kinetic parameters, (c)  $V_{max}$ , and (d)  $K_m$  in k-ecoli307. (a) Distribution of values assumed by WT enzyme fractions (red bars) and standard deviations (green bars) for estimated enzyme fractions.

(a)

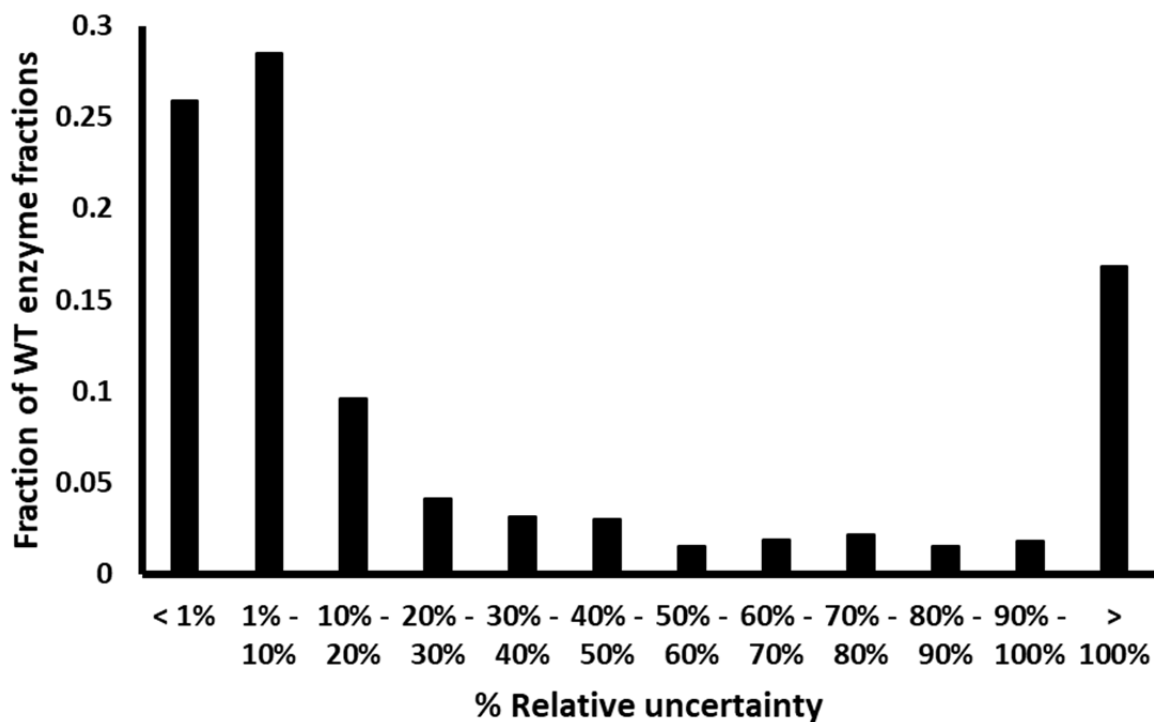

(b)

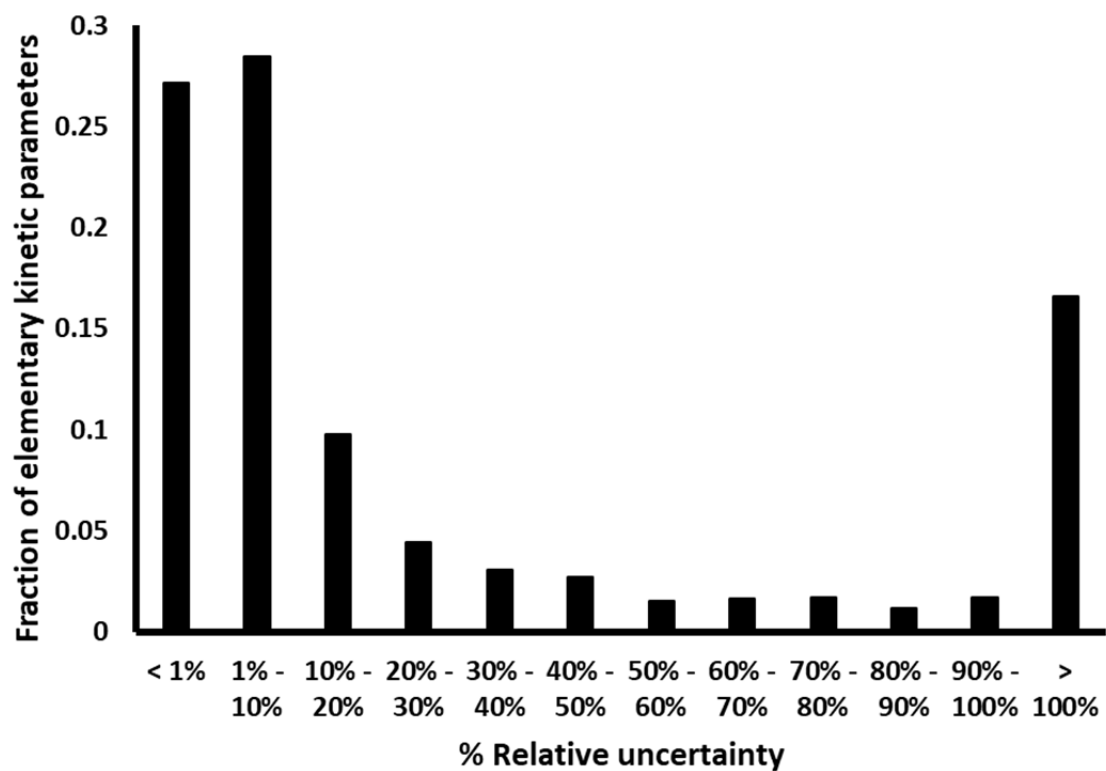

(c)

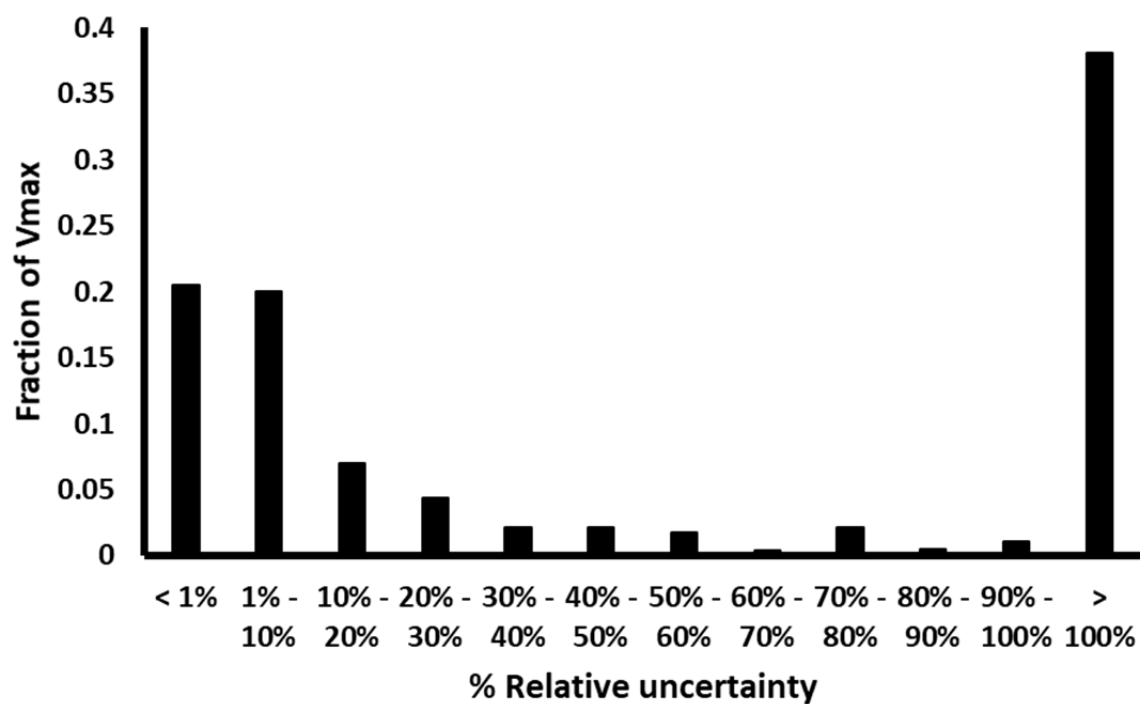

(d)

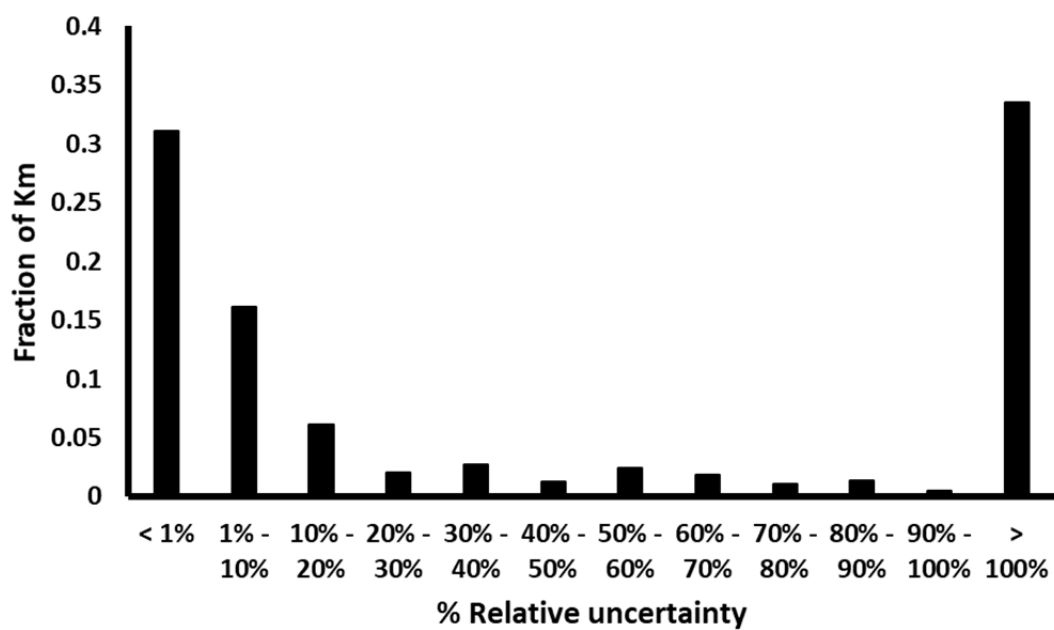

Table 1: Comparison of predicted product yields (mol/mol glucose) with experimental yields in engineered over-producing strains of *E. coli*. The experimental yields and predictions by k-ecoli457 were obtained from previously published data by Khodayari and Maranas (Khodayari and Maranas, 2016)

| Product     | Perturbed Enzyme      | Predicted Yield | Predicted Yield (k-ecoli457) | Experimental Yield |
|-------------|-----------------------|-----------------|------------------------------|--------------------|
| Acetate     | 0.1x RPI              | 0.93            | 0.2                          | 0.75               |
| L-Valine    | 0.1x THRD             | 0.03            | 0.02                         | 0.34               |
| Lactate     | 0x ACKr               | 1.4             | 1.11                         | 1.13               |
| Malate      | 0.3x PTA;<br>10x PPCK | 0.16            | 0.84                         | 0.15               |
| Artemisinin | 2x PDH                | 0.17            | 0.03                         | 0.38               |
| Naringenin  | 2xACCOAC              | 0.026           | 0.012                        | 0.008              |

#### References:

Khodayari, A., and Maranas, C.D. (2016). A genome-scale Escherichia coli kinetic metabolic model k-ecoli457 satisfying flux data for multiple mutant strains. *Nat Commun* 7, 13806.

Supplementary Figure S1: Overview of the K-FIT algorithm showing the flow of information between various components.

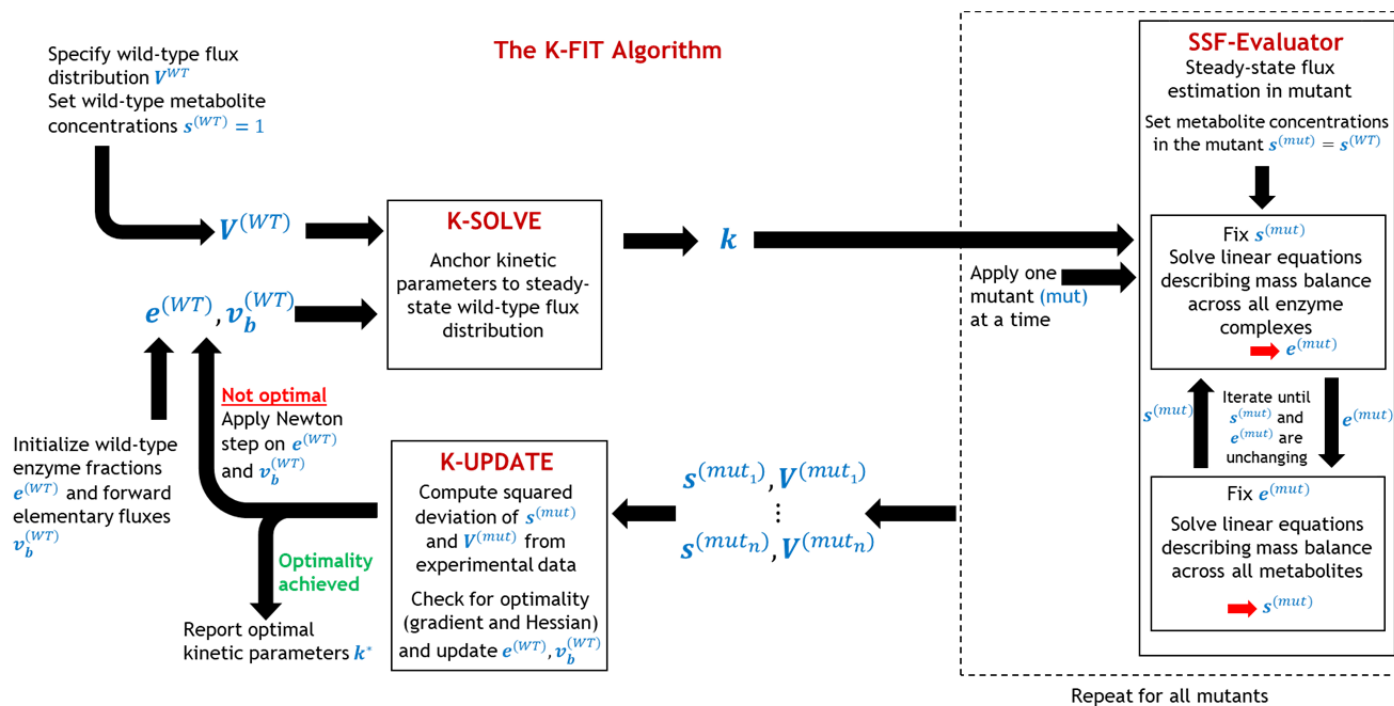

Supplementary Figure S2: Test models used to benchmark the performance of K-FIT against GA-based EM procedure. (a) Small model containing 14 reactions and 11 metabolites. (b) Medium-sized model containing 33 reactions and 28 metabolites. (c) Core model containing 108 reactions and 65 metabolites. Reactions knocked out in the single gene-deletion mutants are indicated using a red X.

(a)

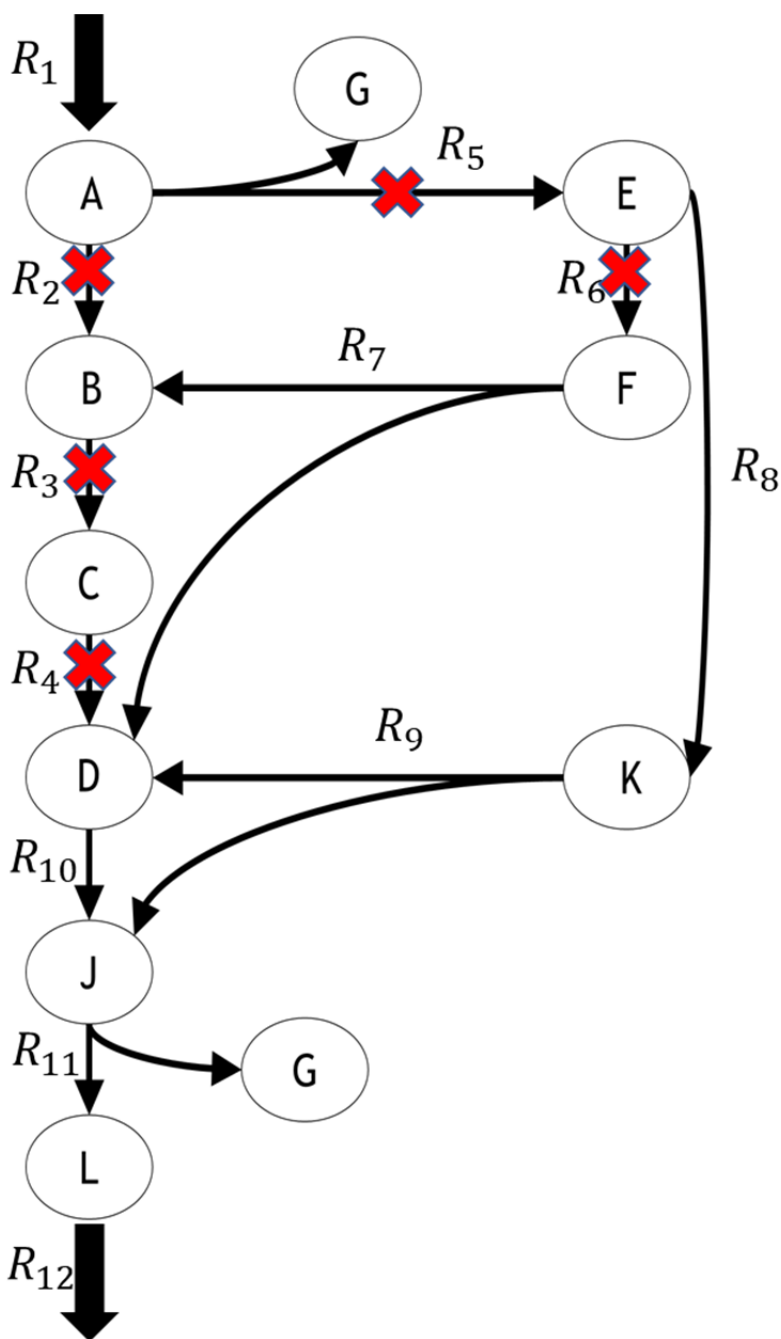



(b)

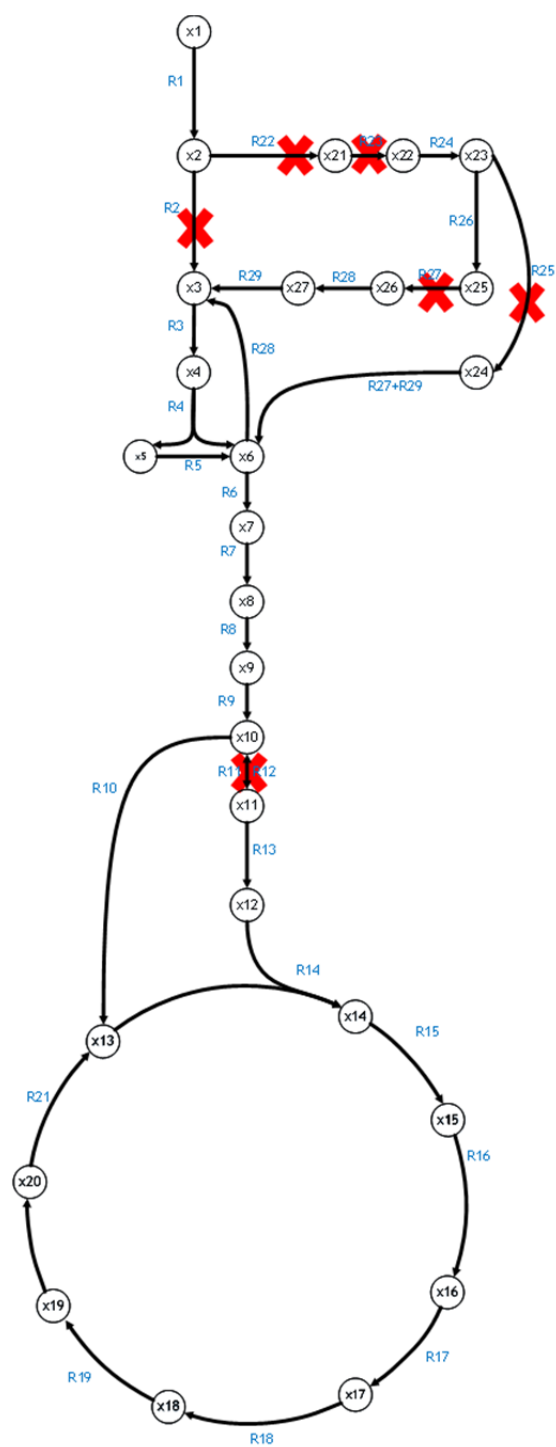



Supplementary Figure S3: Flux distribution through central metabolism of the expanded model for *E. coli* in (a)  $\Delta eda$ , (b)  $\Delta edd$ , (c)  $\Delta fbp$ , (d)  $\Delta zwf$ , (e)  $\Delta gnd$ , and (f)  $\Delta pgi$  mutant strains. Reactions representing metabolite flows between central and peripheral metabolism are indicated using green arrows. Fluxes elucidated using  $^{13}\text{C}$ -MFA are shown in green and the corresponding flux prediction by the expanded kinetic model is shown in brown. Reactions corresponding to the knocked-out genes in each mutant strain are indicated using red arrows. Flux measurements for PFK and FBP were not fitted due to poor resolution  $^{13}\text{C}$ -MFA

(a)

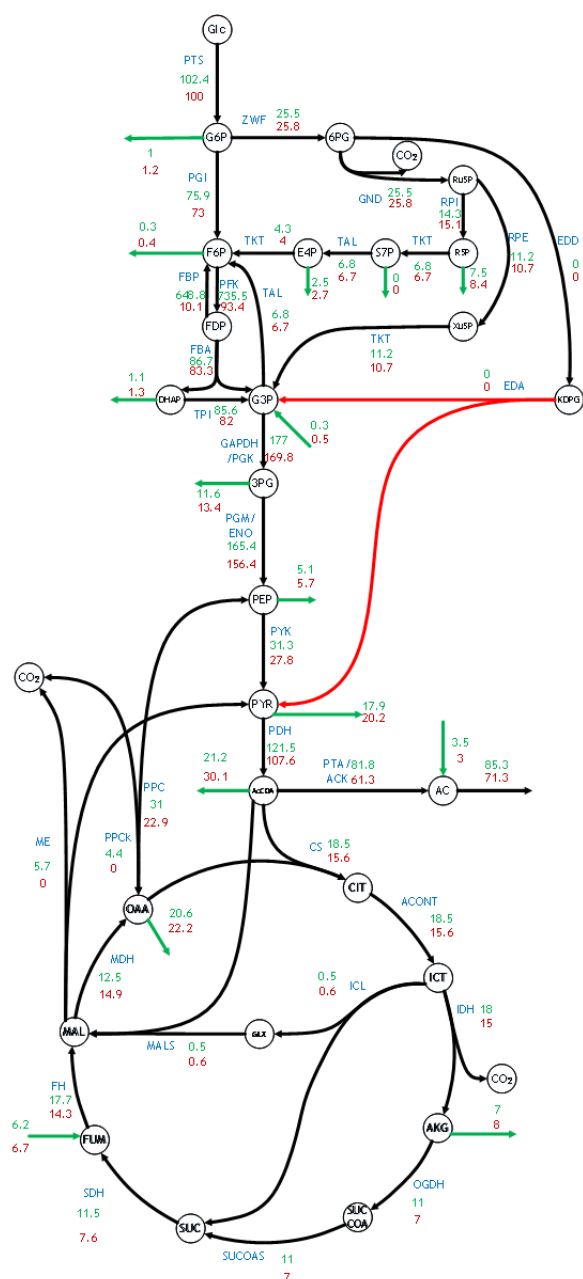

(b)

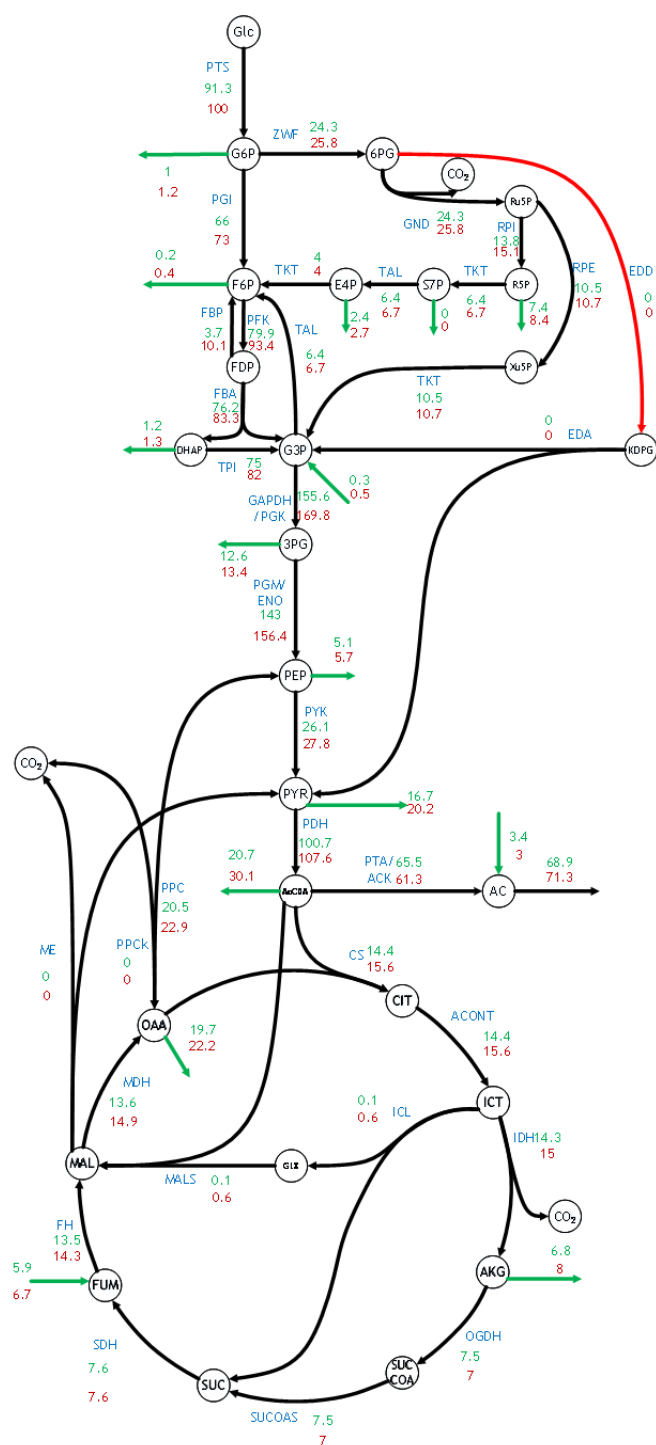



(d)

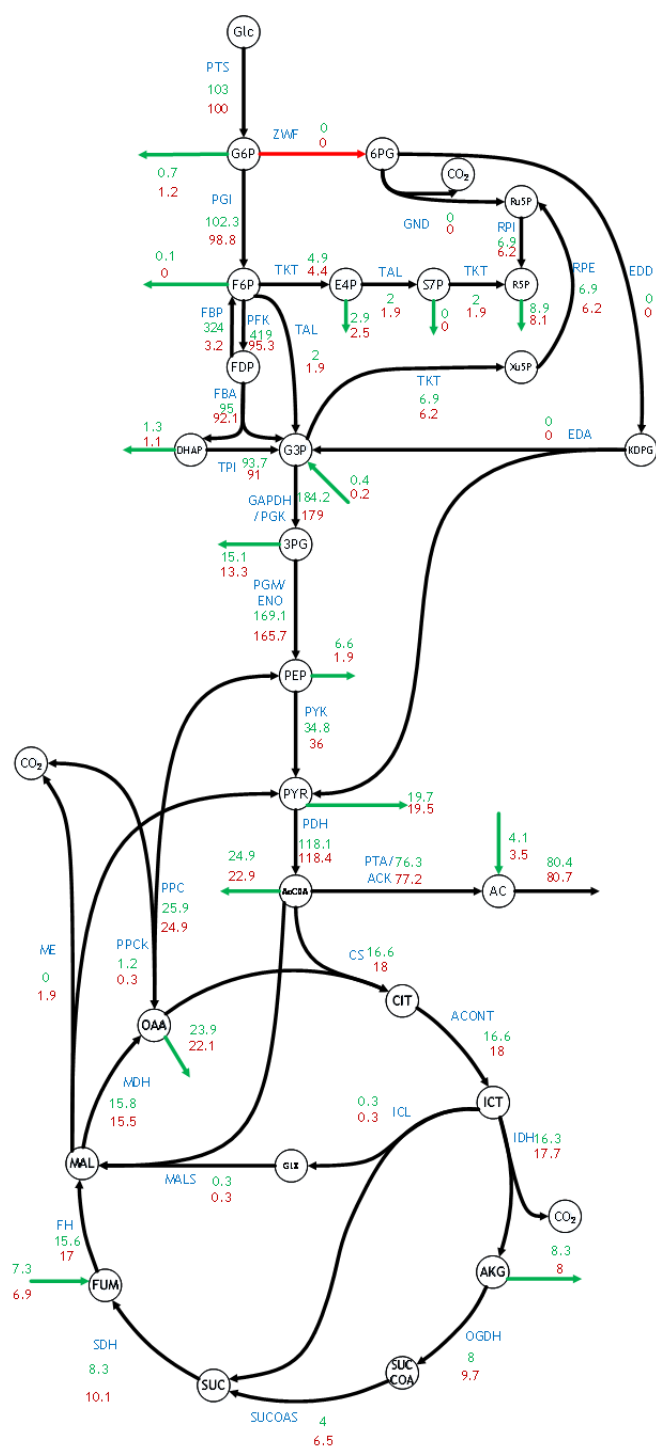



(f)

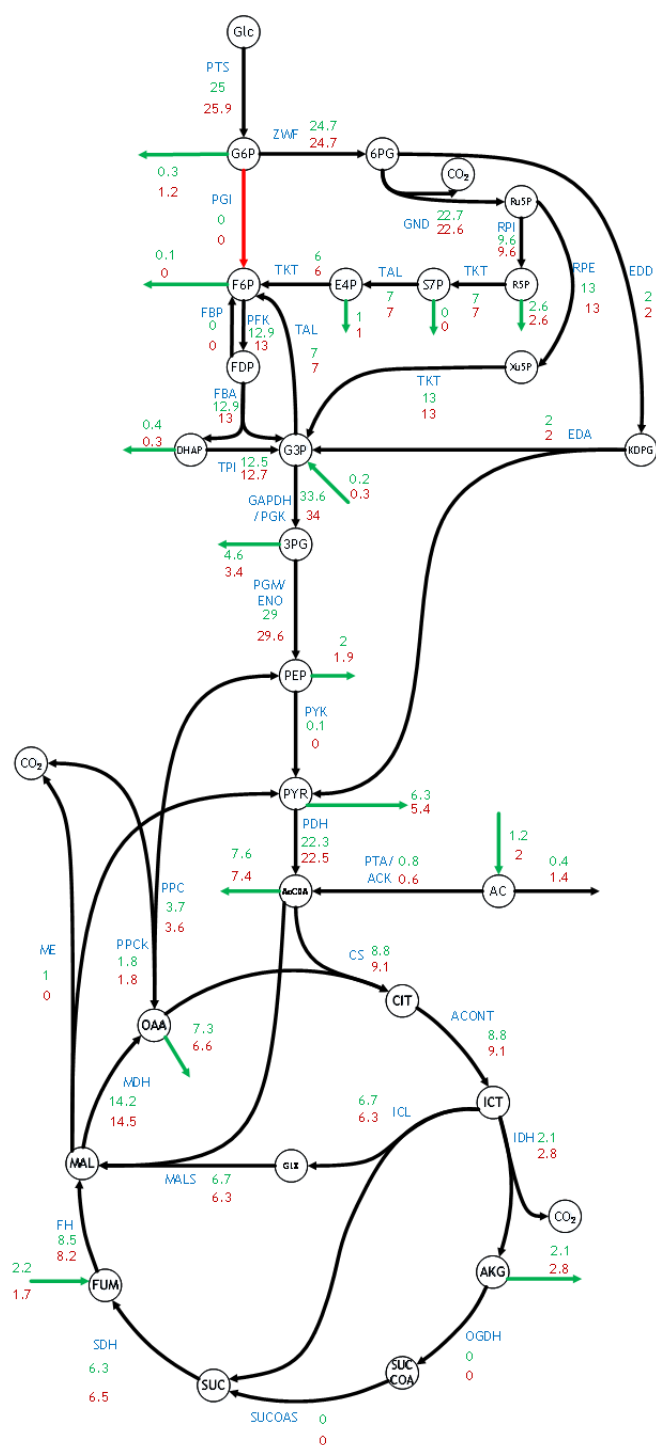



Supplementary Figure S4: Distribution of standard deviations for estimated (a) WT enzyme fractions, (b) elementary kinetic parameters, (c)  $K_m$ , and (d)  $V_{max}$  in k-ecoli307

(a)

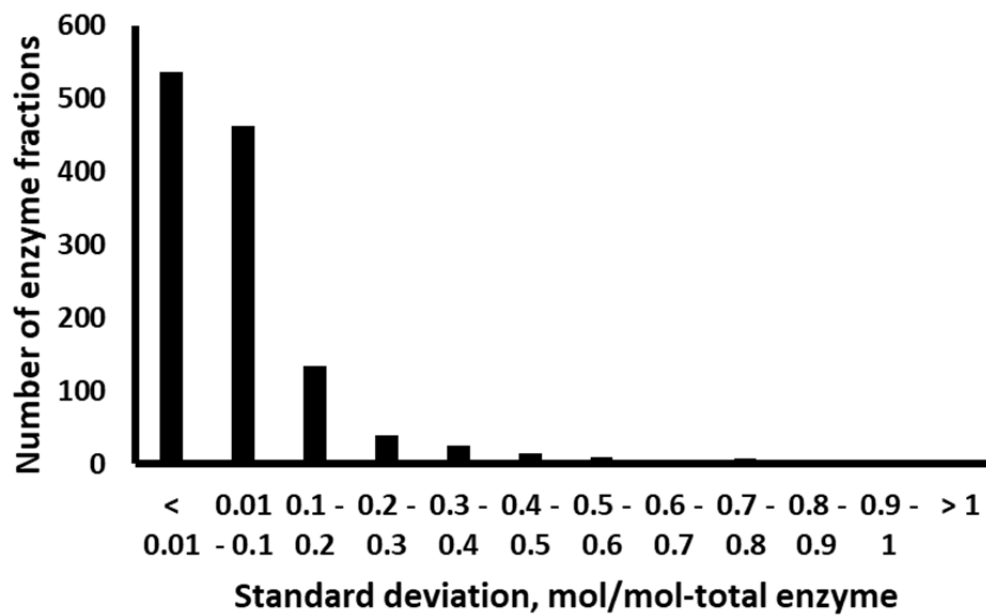

(b)

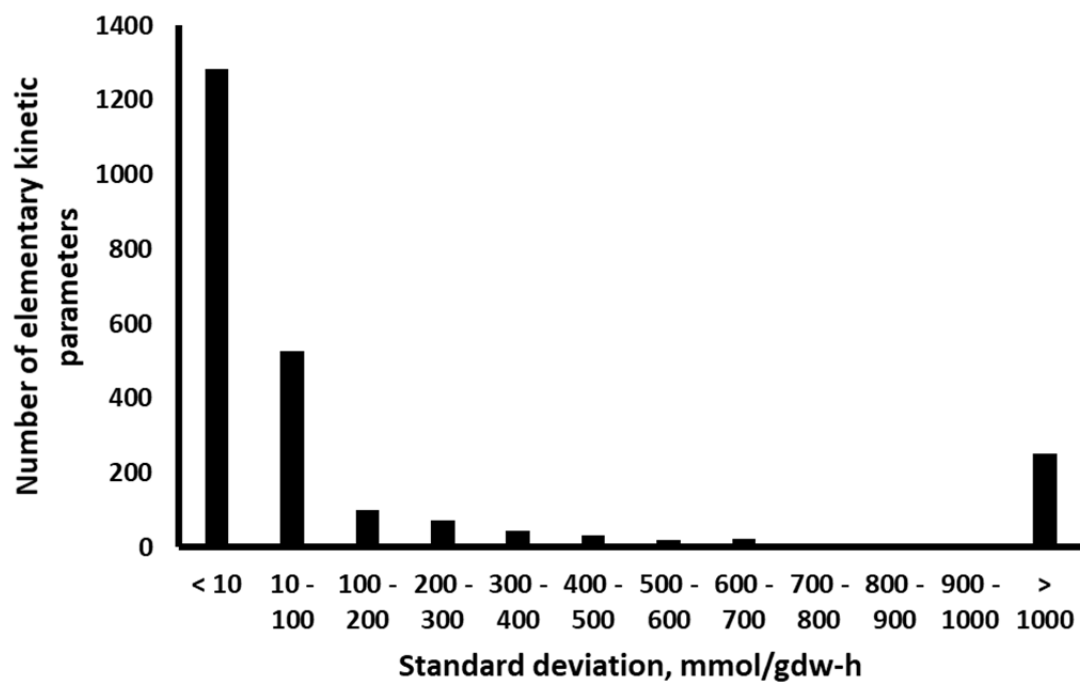

(c)

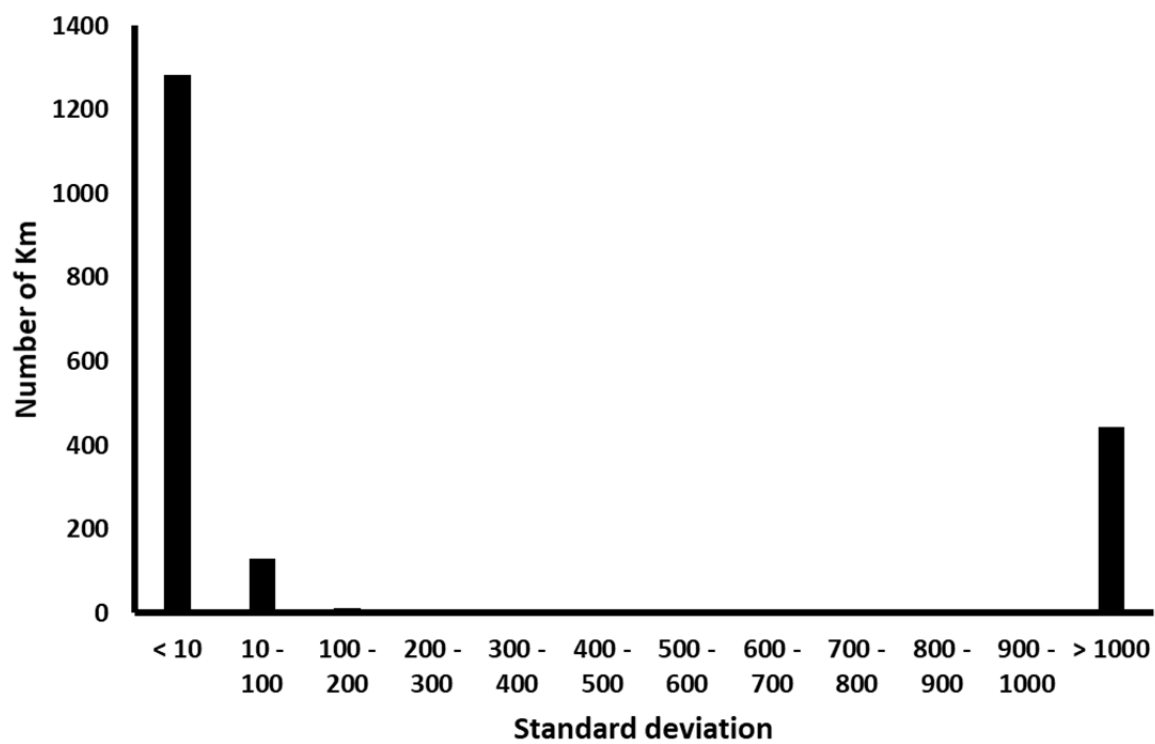

(d)

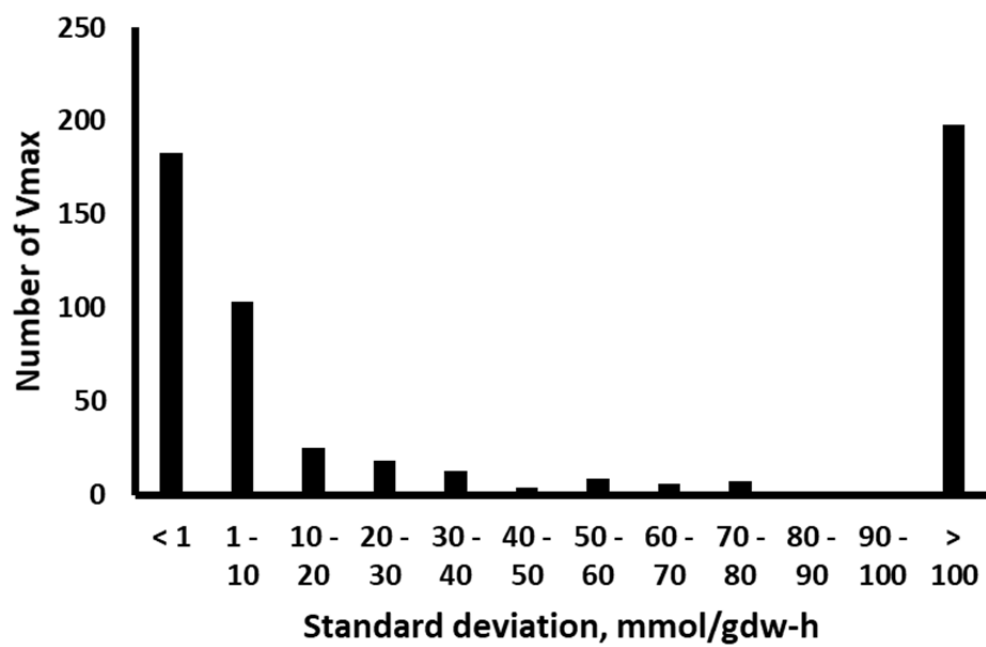

Supplementary Figure S5: Distribution of values assumed by (a) WT enzyme fractions, (b) elementary kinetic parameters, (c)  $K_m$ , and (d)  $V_{max}$  in k-ecoli307

(a)

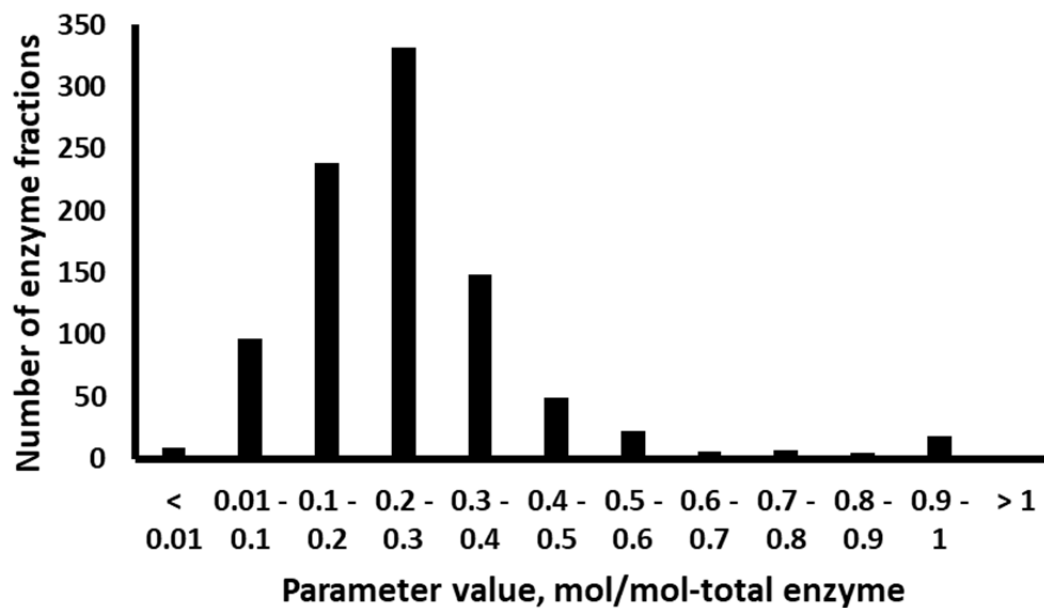

(b)

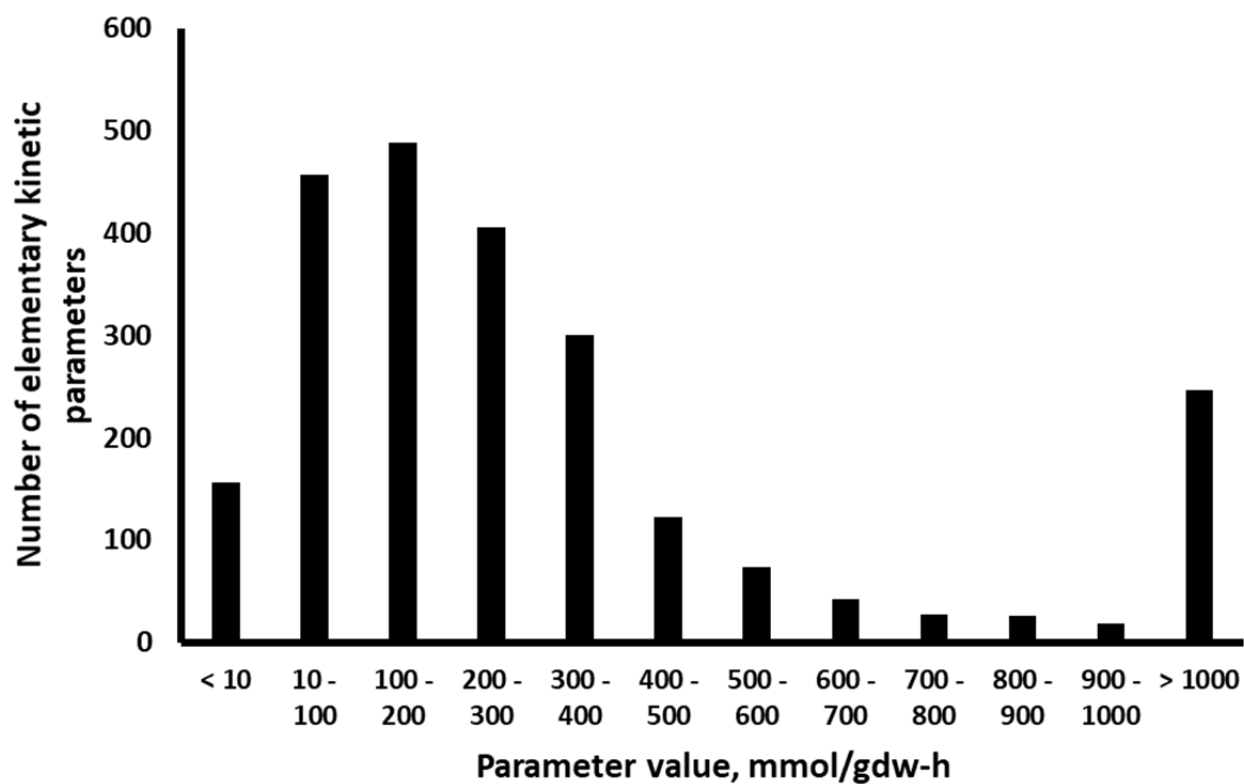

(c)

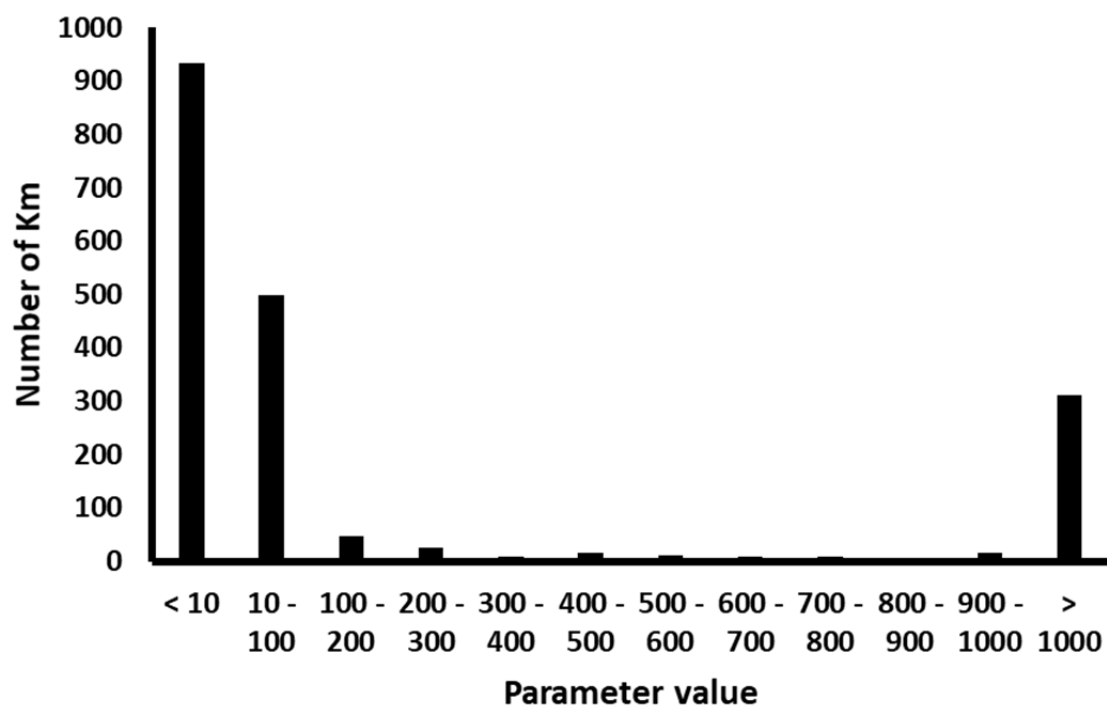

(d)

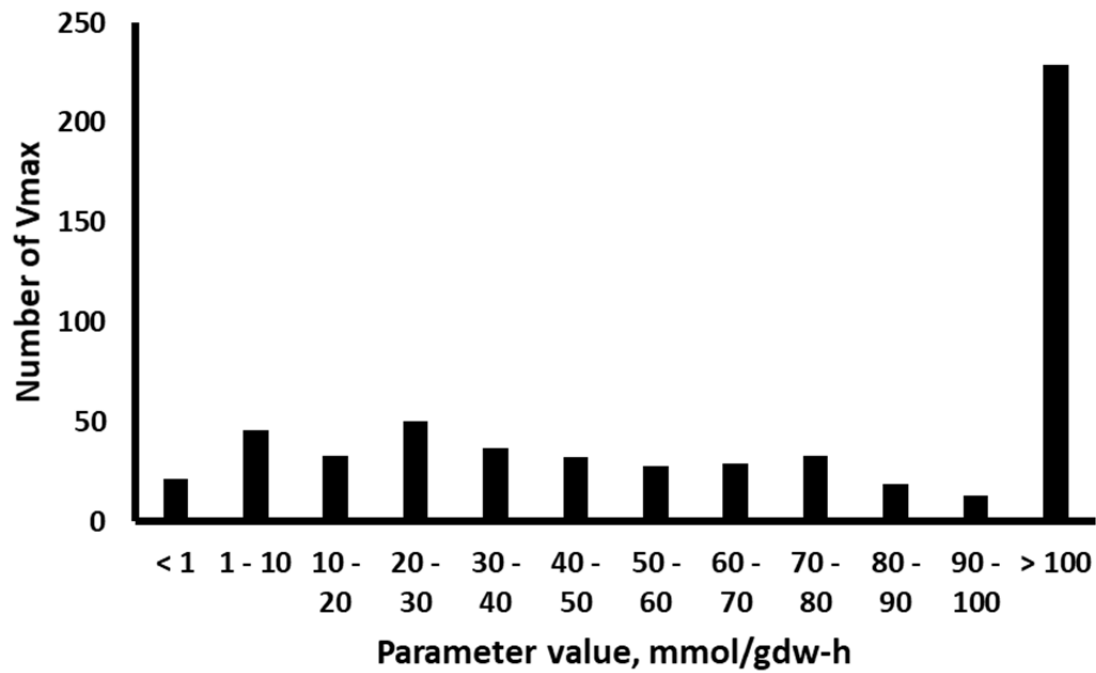

Source: https://www.biorxiv.org/content/10.1101/612994v1.full.pdf
